# Supplementary material
Source: PubMed Central journal article supplement (PMC9704354)
Supplement: NIHMS1804672-supplement-Supplementary_Materials__figures__tables.pdf [file NIHMS1804672-supplement-Supplementary_Materials__figures__tables.pdf]

**Supplemental Table 1.** We conducted an Exploratory factor Analysis prior to CFA to determine if a solution with two factors and the same indicators was appropriate in this sample. The analysis was conducted using the robust Maximum Likelihood (MLR) estimator. As in our previous analyses, we used the lower bound RMSEA to determine the optimal number of factors. The EFA supported a two-factor solution when applied to the seven subscales, and suggested that widespread pain, somatic awareness, and sensory sensitivity load most strongly on one factor, while sleep disturbance, fatigue, cognitive dysfunction, and depression load most strongly on a second factor. These findings are generally analogous to those identified in the original paper. Overall, model fit was adequate:  $X^2=6.029$ ,  $df= 8$ ,  $p =.644$ . RMSEA = .000, 90% CI = .000, .068. CFI = 1.000. SRMR = .019. Geomin rotated loadings of seven scales (n=201).

| <b>Measure</b>        | <b>Factor 1</b> | <b>Factor 2</b> |
|-----------------------|-----------------|-----------------|
| Number of pain sites  | <b>0.619</b>    | 0.065           |
| Somatic Awareness     | <b>0.740</b>    | 0.005           |
| Sensory Sensitivity   | <b>0.722</b>    | -0.204          |
| Fatigue               | -0.005          | <b>0.910</b>    |
| Sleep Disturbance     | 0.184           | <b>0.530</b>    |
| Depressive Symptoms   | -0.029          | <b>0.644</b>    |
| Cognitive Dysfunction | <b>0.351</b>    | <b>0.370</b>    |
| Factor Correlation:   | <b>.568</b>     |                 |

**Supplemental Table 2.** Non-parametric association between painful symptoms and the GSS Brief measure.

|                                       | GSS Brief             |           |
|---------------------------------------|-----------------------|-----------|
|                                       | <u>Spearman's Rho</u> |           |
| Menstrual Pain (VAS) – without NSAIDs | .030                  |           |
| Menstrual Pain (VAS) – with NSAIDs    | .138                  | * p < .05 |
| Pelvic Pain (VAS)                     | .299*                 |           |
| Urinary Pain (VAS)                    | .261*                 |           |
| Bowel Pain (VAS)                      | .409*                 |           |
| Overall pain                          | .351*                 |           |

**Supplemental Table 3.** Measures, references, and standardized factor loadings, used to calculate GSS and SPACE factor scores.

| Measure                                                             | Reference                  | Standardized Factor Loading |
|---------------------------------------------------------------------|----------------------------|-----------------------------|
| <b>GSS</b>                                                          |                            |                             |
| Somatic Awareness                                                   | Supplemental Table 1 [33]  | .767                        |
| Sensory sensitivity                                                 | Supplemental Table 1 [33]  | .557                        |
| Widespread Pain Index                                               | [40]                       | .666                        |
| GSS Brief                                                           | Supplemental Figure 4 [33] | NA                          |
| <b>SPACE</b>                                                        |                            |                             |
| PROMIS®sleep disturbance short-form 8a                              | [41]                       | .666                        |
| PROMIS® emotional distress depression short-form 8a                 | [32]                       | .669                        |
| 2011 Fibromyalgia survey criteria “trouble thinking or remembering” | [40]                       | .632                        |
| PROMIS® Fatigue short-form 7a                                       | [5]                        | .849                        |
